# Supplementary material
Source: PubMed Central journal article supplement (PMC5362745)
Supplement: es7b00107_si_001.pdf [file es7b00107_si_001.pdf]

## Supporting Information for:

### Structures and properties of As(OH)<sub>3</sub> adsorption complexes on hydrated mackinawite (FeS) surfaces: A DFT-D2 study

*Nelson Y. Dzade<sup>1\*</sup>, Alberto Roldan<sup>2</sup> and Nora H. de Leeuw<sup>1, 2\*</sup>*

<sup>1</sup>Department of Earth Sciences, Utrecht University, Princetonplein 9, 3584 CC, Utrecht, The Netherlands

<sup>2</sup>School of Chemistry, Cardiff University, Cardiff, CF10 1DF, UK

E-mail: [N.Y.Dzade@uu.nl](mailto:N.Y.Dzade@uu.nl) (N.Y.D); [deLeeuwN@cardiff.ac.uk](mailto:deLeeuwN@cardiff.ac.uk) (N.H.dL)

This supporting information contains the detailed information on all other conformations of As(OH)<sub>3</sub> adsorption complexes, structural parameters and vibrational frequency assignments at the water-FeS{001}, water-FeS{011}, and water-FeS{111} interfaces. It contains three Figures and four Tables.

**Figure S1:** Optimized outer- and inner-sphere adsorption complexes of  $\text{As}(\text{OH})_3$  on  $\text{FeS}(001)$  surface, in side (top) and top (bottom) views. (Colour scheme: (Colour scheme: Fe = grey, S = yellow, As = green,  $\text{O}_{\text{water}}$  = red,  $\text{O}_{\text{As(III)}}$  = pink, and H = white).

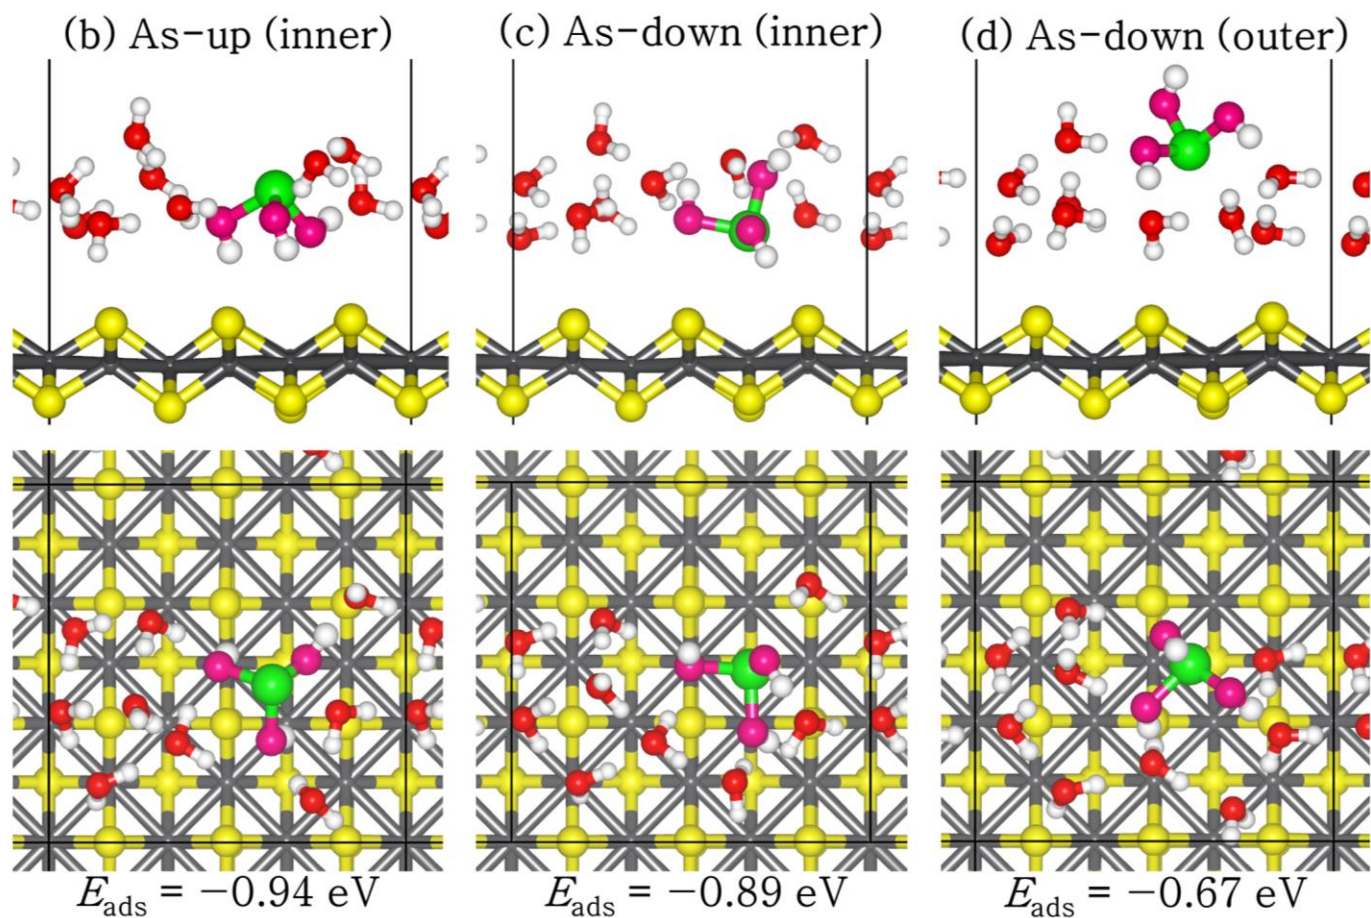

**Figure S2:** Optimized adsorption complexes of As(OH)<sub>3</sub> on FeS(011) surface, in side (top) and top (bottom) views. (Colour scheme: Fe = grey, S = yellow, As = green, O<sub>water</sub> = red, O<sub>As(III)</sub> = pink, and H = white).

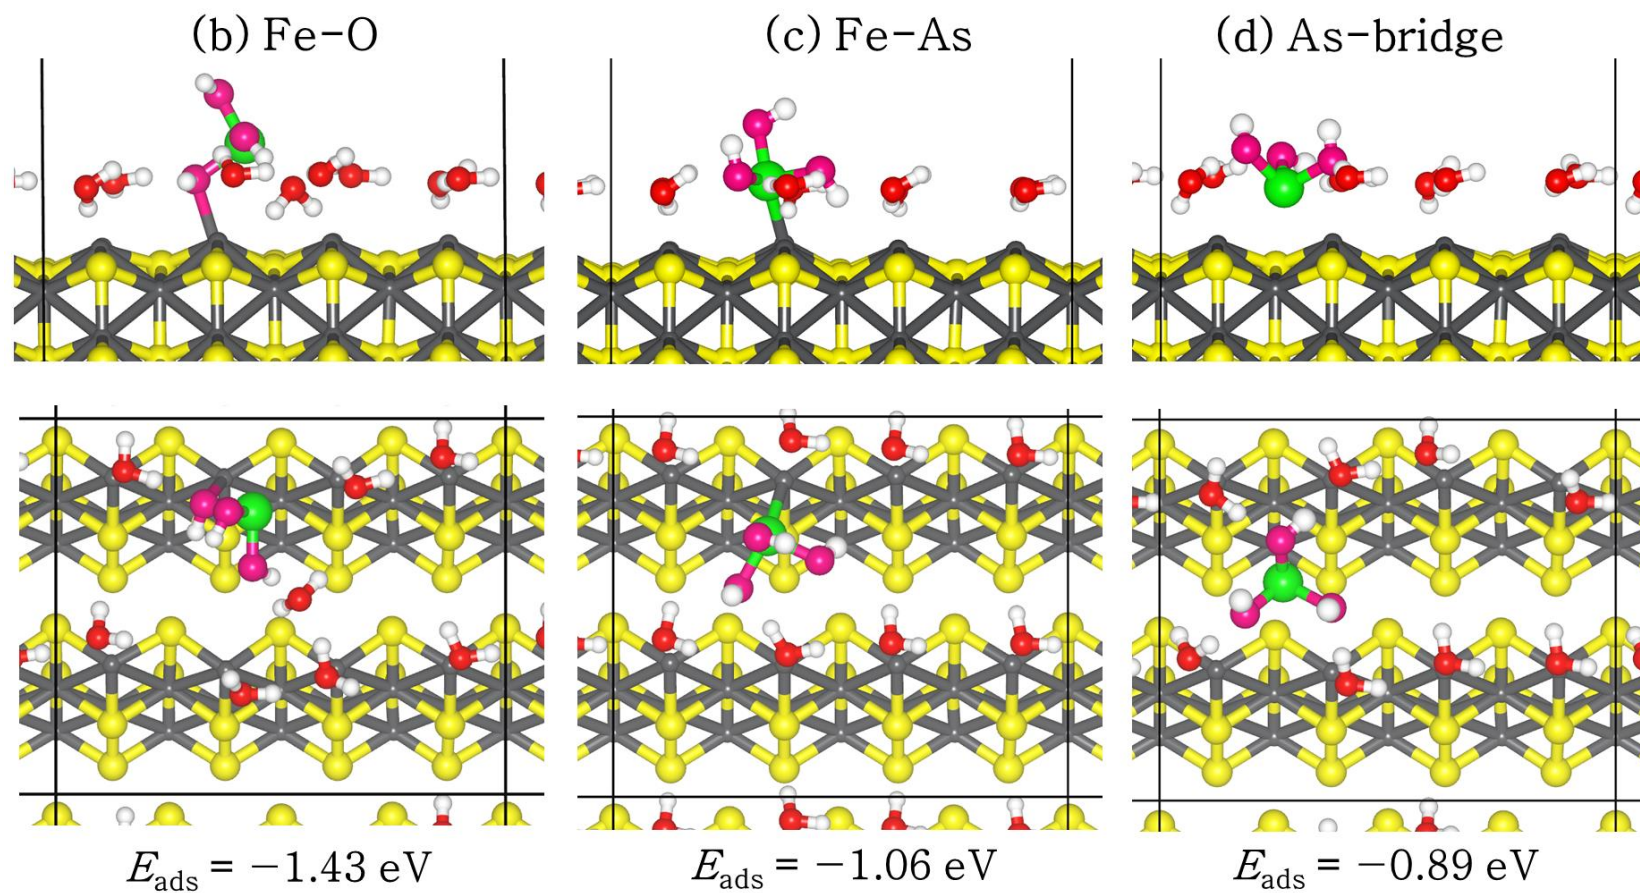

**Figure S3:** Optimized adsorption complexes of  $\text{As}(\text{OH})_3$  on  $\text{FeS}(011)$  surface, in side (top) and top (bottom) views. (Colour scheme: Fe = grey, S = yellow, As = green,  $\text{O}_{\text{water}}$  = red,  $\text{O}_{\text{As(III)}}$  = pink, and H = white).

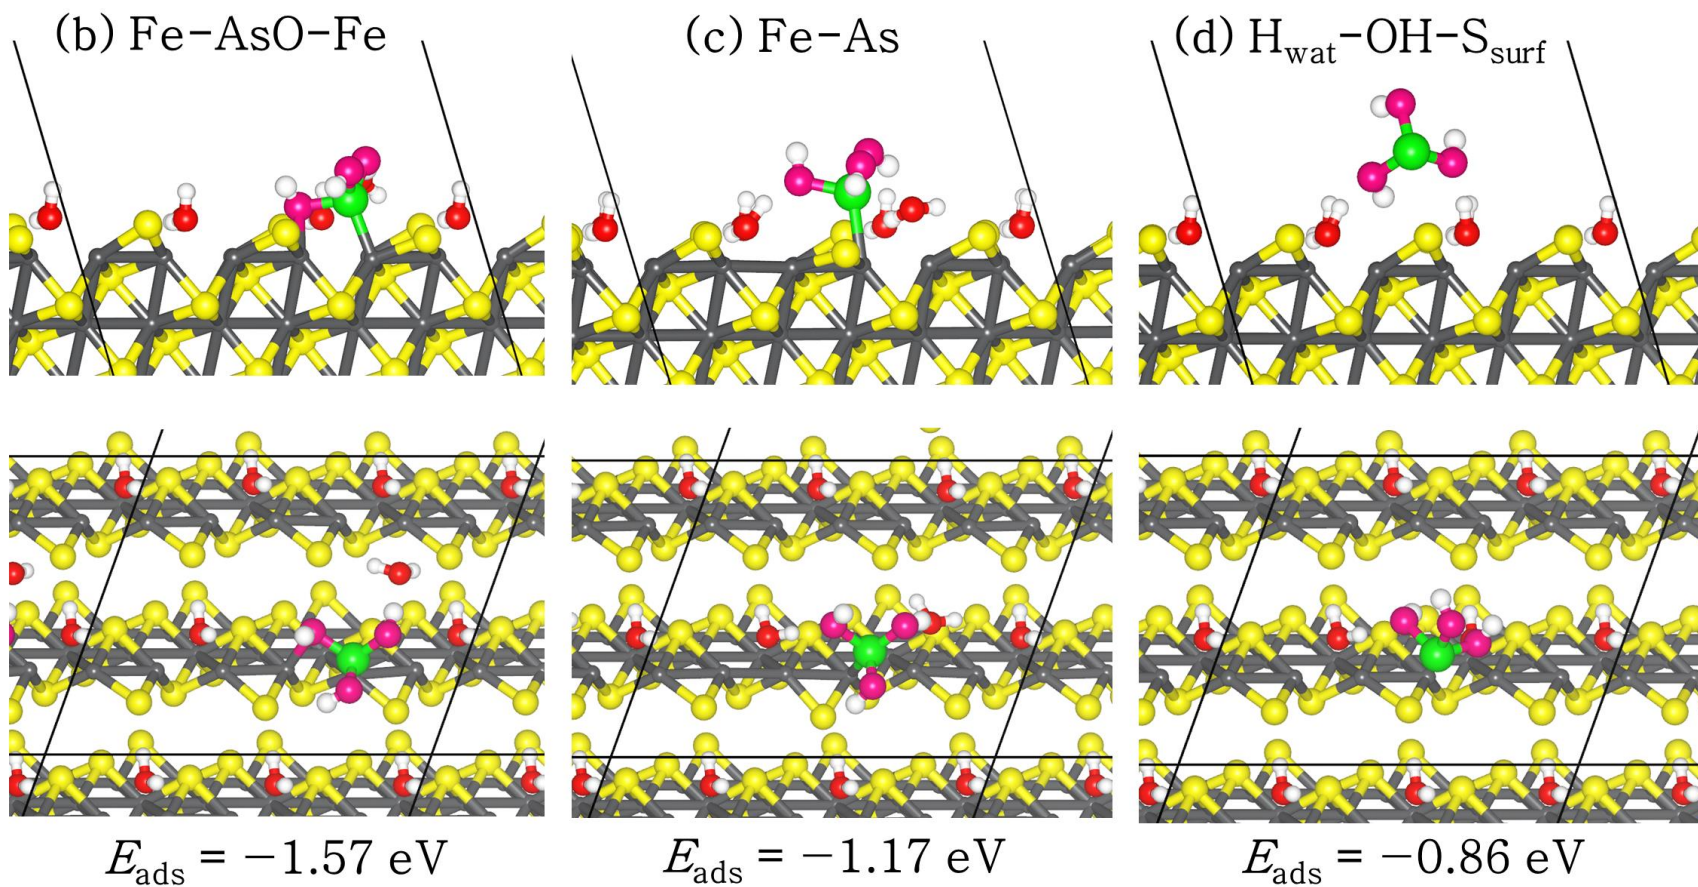

**TABLE S1:** Adsorption energies, variation of the total Bader charge, representative geometrical parameters, and interatomic distances of As(OH)<sub>3</sub> adsorption complexes at water-FeS{001} surface.

| Configuration                                                 | As-up (inner) | As-down (outer) | As-down (inner) |
|---------------------------------------------------------------|---------------|-----------------|-----------------|
| $E_{\text{ads}} / \text{eV}$                                  | -0.94         | -0.89           | -0.67           |
| $\sum q / e^-$                                                | 0.02          | 0.01            | 0.02            |
| $d(\text{As-O}) / \text{\AA}$                                 | 1.867         | 1.864           | 1.875           |
|                                                               | 1.941         | 1.809           | 1.772           |
|                                                               | 1.772         | 1.789           | 1.866           |
| $d(\text{O-H}) / \text{\AA}$                                  | 0.979         | 0.995           | 0.980           |
|                                                               | 0.980         | 0.978           | 1.046           |
|                                                               | 1.031         | 1.002           | 0.975           |
| $d(\text{H}_{\text{mol}}-\text{O}_{\text{wat}}) / \text{\AA}$ | 1.578         | 1.709, 1.773    | 1.512           |
| $d(\text{H}_{\text{wat}}-\text{O}_{\text{mol}}) / \text{\AA}$ | 1.714, 1.800  | 1.613           | 1.811, 2.158    |
| $d(\text{H}_{\text{wat}}-\text{S}) / \text{\AA}$              | 2.502         | 2.318           | 2.819           |
| $d(\text{H}_{\text{mol}}-\text{S}) / \text{\AA}$              | 2.635         | 4.425           | 2.438           |
| $d(\text{As-S}) / \text{\AA}$                                 | 4.377         | 5.656           | 3.688           |

**TABLE S2:** Adsorption energies, variation of the total Bader charge, representative geometrical parameters, and interatomic distances of As(OH)<sub>3</sub> adsorption complexes at water-FeS{011} surface.

| Configuration                                                 | Fe-O  | Fe-As        | As-bridge           |
|---------------------------------------------------------------|-------|--------------|---------------------|
| $E_{\text{ads}} / \text{eV}$                                  | -1.43 | -1.06        | -0.89               |
| $\sum q / e^-$                                                | 0.21  | 0.18         | 0.08                |
| $d(\text{As-O}) / \text{\AA}$                                 | 1.907 | 1.907        | 1.869               |
|                                                               | 1.793 | 1.840        | 1.883               |
|                                                               | 1.787 | 1.838        | 1.866               |
| $d(\text{O-H}) / \text{\AA}$                                  | 1.011 | 0.981        | 0.976               |
|                                                               | 0.983 | 0.978        | 0.993               |
|                                                               | 0.978 | 0.985        | 0.978               |
| $d(\text{H}_{\text{mol}}-\text{O}_{\text{wat}}) / \text{\AA}$ | 1.652 | 3.157        | 1.854               |
| $d(\text{H}_{\text{wat}}-\text{O}_{\text{mol}}) / \text{\AA}$ | 1.829 | 1.734, 2.489 | 1.640, 1.683, 1.708 |
| $d(\text{O-Fe}) / \text{\AA}$                                 | 2.216 | 3.968        | 3.545               |
| $d(\text{As-S}) / \text{\AA}$                                 | 4.147 | 2.960        | 3.404               |
| $d(\text{As-Fe}) / \text{\AA}$                                | 3.348 | 2.464        | 3.787               |

**TABLE S3:** Adsorption energies, variation of the total Bader charge, representative geometrical parameters, and interatomic distances of As(OH)<sub>3</sub> adsorption complexes at water-FeS{111} surface.

| Configuration                                                 | Fe-AsO-Fe | Fe-As | H <sub>wat</sub> -OH-S <sub>surf</sub> |
|---------------------------------------------------------------|-----------|-------|----------------------------------------|
| $E_{\text{ads}} / \text{eV}$                                  | -1.57     | -1.17 | -0.86                                  |
| $\sum q / e^-$                                                | 0.22      | 0.16  | 0.01                                   |
| $d(\text{As-O}) / \text{\AA}$                                 | 1.835     | 1.853 | 1.860                                  |
|                                                               | 1.788     | 1.794 | 1.848                                  |
|                                                               | 1.758     | 1.783 | 1.816                                  |
| $d(\text{O-H}) / \text{\AA}$                                  | 1.014     | 0.991 | 0.980                                  |
|                                                               | 0.988     | 0.986 | 0.978                                  |
|                                                               | 0.980     | 0.978 | 0.978                                  |
| $d(\text{H}_{\text{mol}}-\text{O}_{\text{wat}}) / \text{\AA}$ | 1.659     | 1.784 | 2.800                                  |
| $d(\text{H}_{\text{wat}}-\text{O}_{\text{mol}}) / \text{\AA}$ | 3.838     | 1.619 | 1.600, 1.740                           |
| $d(\text{H}_{\text{wat}}-\text{S}) / \text{\AA}$              | 2.033     | 2.023 | 2.033                                  |
| $d(\text{H}_{\text{mol}}-\text{S}) / \text{\AA}$              | 2.426     | 2.352 | 3.549                                  |
| $d(\text{O-Fe}) / \text{\AA}$                                 | 2.091     | 3.332 | 3.557                                  |
| $d(\text{As-S}) / \text{\AA}$                                 | 3.078     | 3.195 | 3.271                                  |
| $d(\text{As-Fe}) / \text{\AA}$                                | 2.217     | 2.530 | 4.235                                  |

**Table S4:** Molecular vibrational frequencies (in  $\text{cm}^{-1}$ ) of adsorbed  $\text{As}(\text{OH})_3$  at water–FeS interfaces.

| Surface  | Configuration                 | v(As–O)                     |                             |                             | v(O–H) |        |        |
|----------|-------------------------------|-----------------------------|-----------------------------|-----------------------------|--------|--------|--------|
|          |                               | As–O1                       | As–O2                       | As–O3                       | O1–H   | O2–H   | O2–H   |
|          | Free $\text{As}(\text{OH})_3$ | 700.8<br>(710) <sup>a</sup> | 639.1<br>(655) <sup>a</sup> | 638.3<br>(655) <sup>a</sup> | 3738.1 | 3711.5 | 3674.7 |
| FeS(001) | As–up–inner                   | 715.2                       | 553.7                       | 460.5                       | 3648.4 | 3637.0 | 2666.1 |
|          | As–down–outer                 | 684.61                      | 636.4                       | 563.9                       | 3679.3 | 3317.0 | 3177.2 |
|          | As–down–inner                 | 718.0                       | 564.3                       | 546.3                       | 3644.6 | 3607.7 | 2446.9 |
| FeS(011) | As–bridge                     | 562.4                       | 529.7                       | 523.1                       | 3708.8 | 3695.0 | 3381.9 |
|          | Fe–As                         | 584.9                       | 570.1                       | 462.9                       | 3700.4 | 3659.5 | 3530.9 |
|          | Fe–O                          | 696.1                       | 654.4                       | 599.5                       | 3680.6 | 3621.9 | 3011.3 |
| FeS(111) | Fe–AsO–Fe                     | 686.6                       | 639.7                       | 573.0                       | 3644.7 | 3451.0 | 2977.6 |
|          | Fe–As                         | 670.4                       | 629.6                       | 549.2                       | 3708.1 | 3485.8 | 3403.5 |
|          | Fe–O                          | 634.0                       | 586.5                       | 557.6                       | 3701.5 | 3674.6 | 3633.1 |

<sup>a</sup>Loehr, T.M.; Plane, R.A. Raman spectra and structures of arsenious acid and arsenites in aqueous solution. *Inorg. Chem.* **1968**, *7*, 1708–1714.
